# Supplementary material for: Rubbing-assisted approach for highly-oriented collagen fibril arrays involving calcium phosphate precipitation
Source: Royal Society of Chemistry journal article supplement (doi:10.1039/d1qm00114k), 2021-01-01
Supplement: d1qm00114k1.pdf [file d1qm00114k1.pdf]

## **Electronic Supplementary Information**

### **Rubbing-assisted approach for highly-oriented collagen fibril arrays involving calcium phosphate precipitation**

Yadong Chai <sup>a</sup>, Mitsuhiro Okuda <sup>b, c</sup>, Mari Miyata <sup>d</sup>,

Zizhen Liu <sup>a</sup>, Motohiro Tagaya <sup>a, \*</sup>

<sup>a</sup> *Department of Materials Science and Technology, Nagaoka University of Technology,  
Kamitomioka 1603-1, Nagaoka, Niigata 940-2188, Japan*

<sup>b</sup> *CIC nanoGUNE consolider, Avenida Tolosa 76, E-20018, Donostita-San Sebastian, Spain*

<sup>c</sup> *IKERBASQUE, Basque Foundation for Science, 48011 Bilbao, Basque Country, Spain*

<sup>d</sup> *Department of Materials Engineering, National Institute of Technology, Nagaoka College,  
Nagaoka, Japan, 940-8532, Japan*

---

**\* Author to whom correspondence should be addressed:**

Tel: +81-258-47-9345, Fax: +81-258-47-9300, E-mail: tagaya@mst.nagaokaut.ac.jp

**Figure S1**

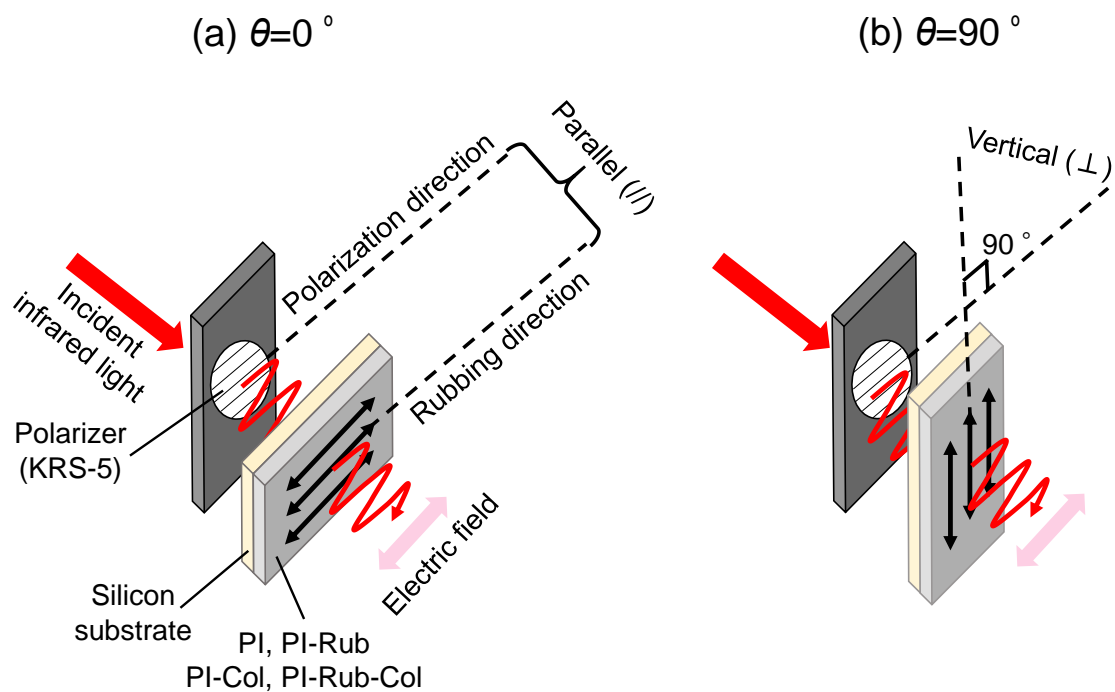

**Figure S1.** Illustration of the polarized FT-IR measurement systems. (a) the state of “polarization direction // rubbing direction” was named as “ $\theta=0^\circ$ ”, and (b) the state of “polarization direction  $\perp$  rubbing direction” was named as “ $\theta=90^\circ$ ”. The  $\theta$  value was changed from  $0^\circ$  to  $90^\circ$ .

**Figure S2**

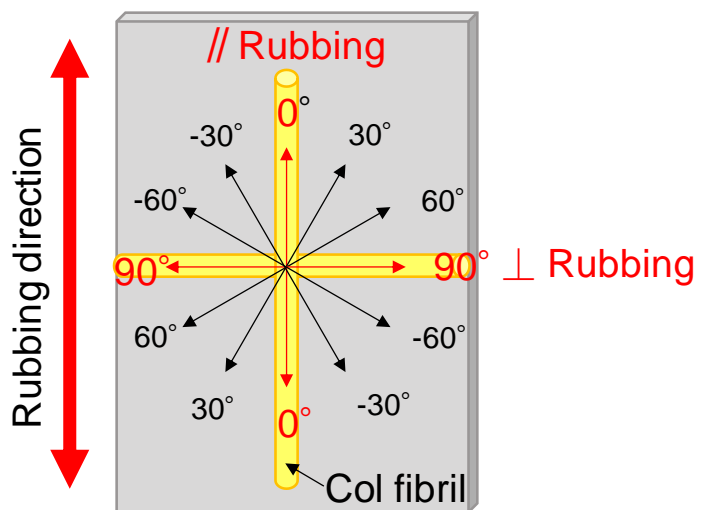

**Figure S2.** Calculation method of O.R. values of Col fibrils on the PI and PI-Rub.

**Figure S3**

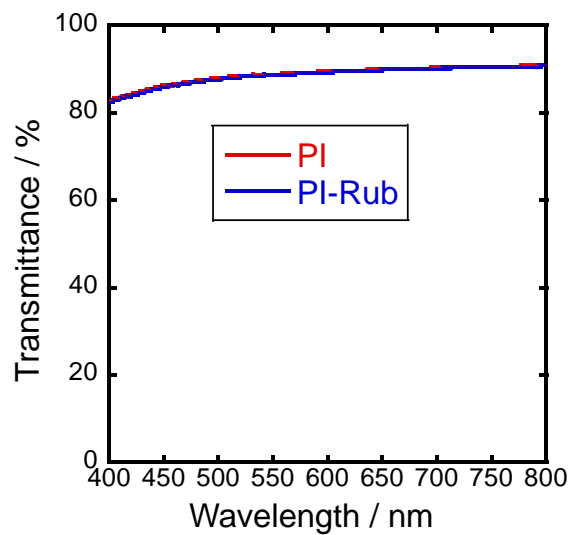

**Figure S3.** UV-Vis spectra of the PI and PI-Rub films where the averaged transmittance values (wavelengths in a visible light region: 400–800 nm) were 88.8 % and 88.6 %, respectively.

**Figure S4**

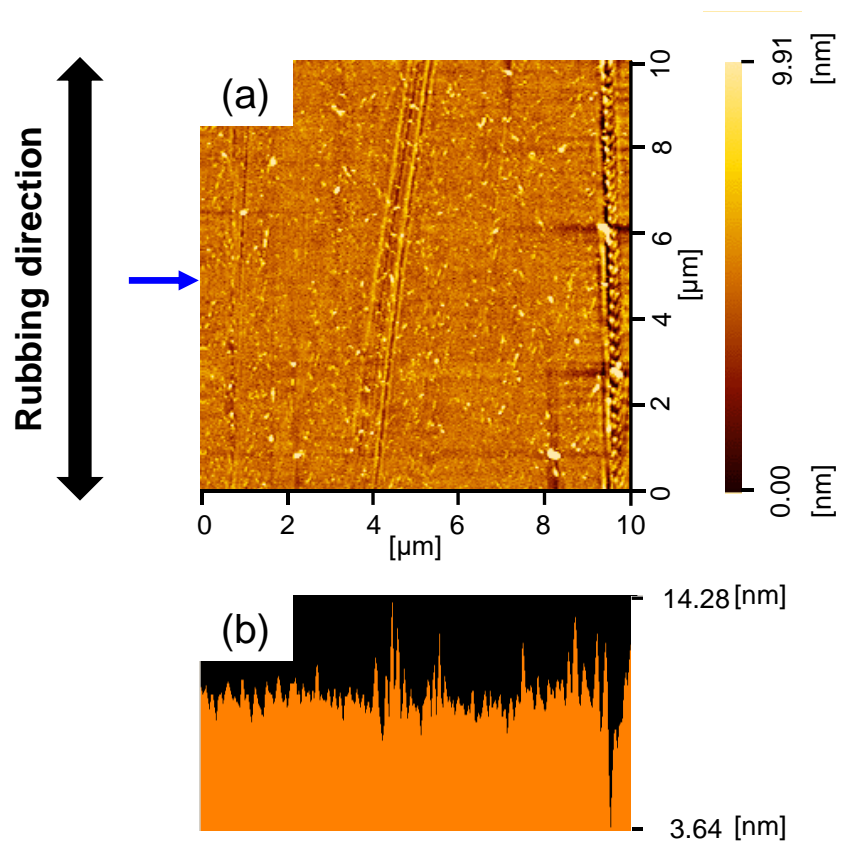

**Figure S4.** Representative (a) AFM topographic image of the PI-Rub film and (b) the height profile taken along the direction of blue-color arrow in (a).

**Figure S5**

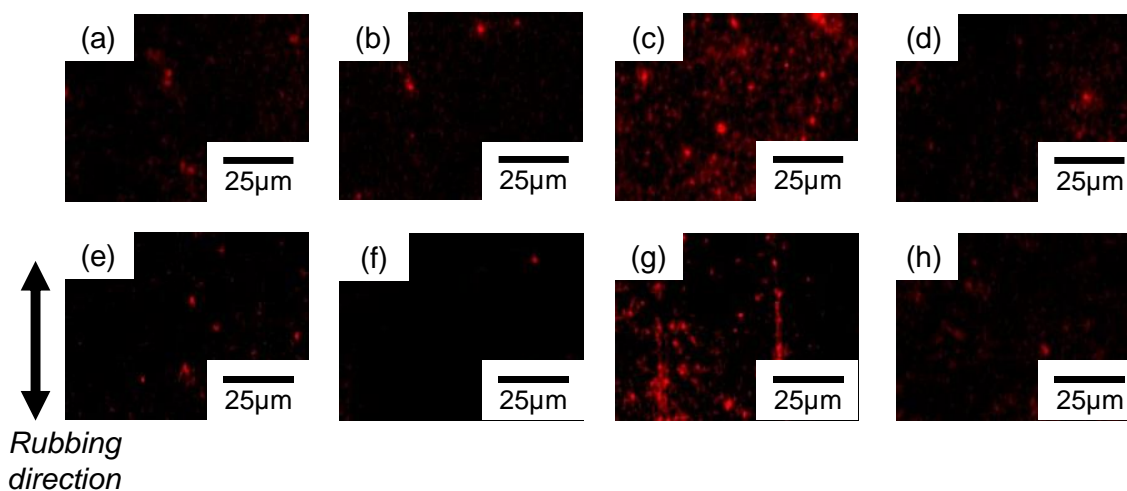

**Figure S5.** Fluorescence microscope images of (a) PI-CM/3, (b) PI-CM/9, (c) PI-AM/3, (d) PI-AM/9, (e) PI-Rub-CM/3, (f) PI-Rub-CM/9, (g) PI-Rub-AM/3, (h) PI-Rub-AM/9 where (a, b, e, f) carboxyl-modified and (c, d, g, h) amino-modified fluorescent poly(styrene) particles adsorbed on (a-d) PI and (e-h) PI-Rub films at the solution pH values of (a, c, e, g) 3 and (b, d, f, h) 9. In particular, (c) amino-modified fluorescent poly(styrene) particles were randomly adsorbed on PI film and (g) were adsorbed along the rubbing direction on PI-Rub film.

**Figure S6**

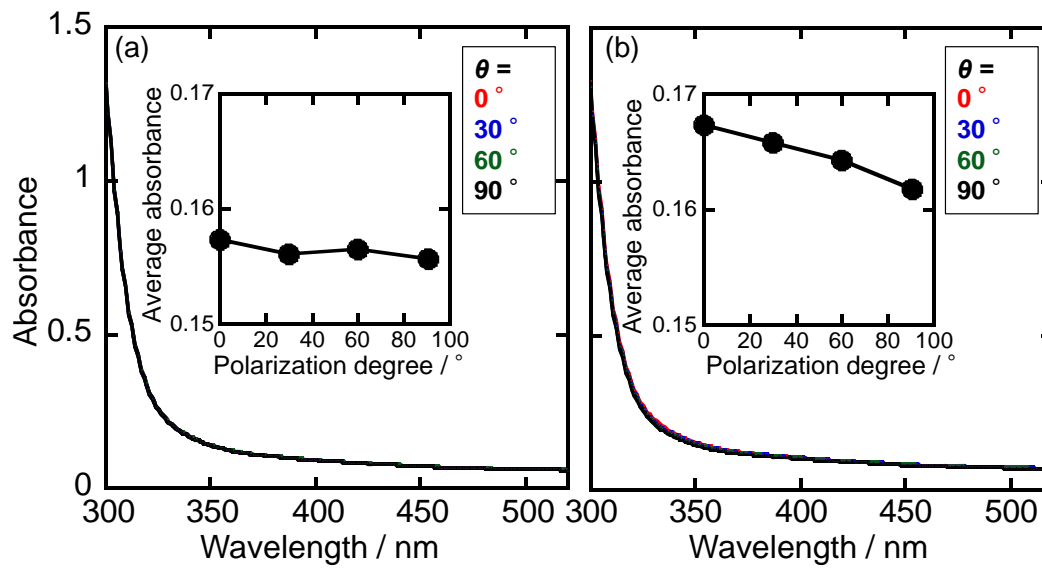

**Figure S6.** Polarized UV-Vis spectral changes of (a) PI-AM/3 and (b) PI-Rub-AM/3 films.

**Figure S7**

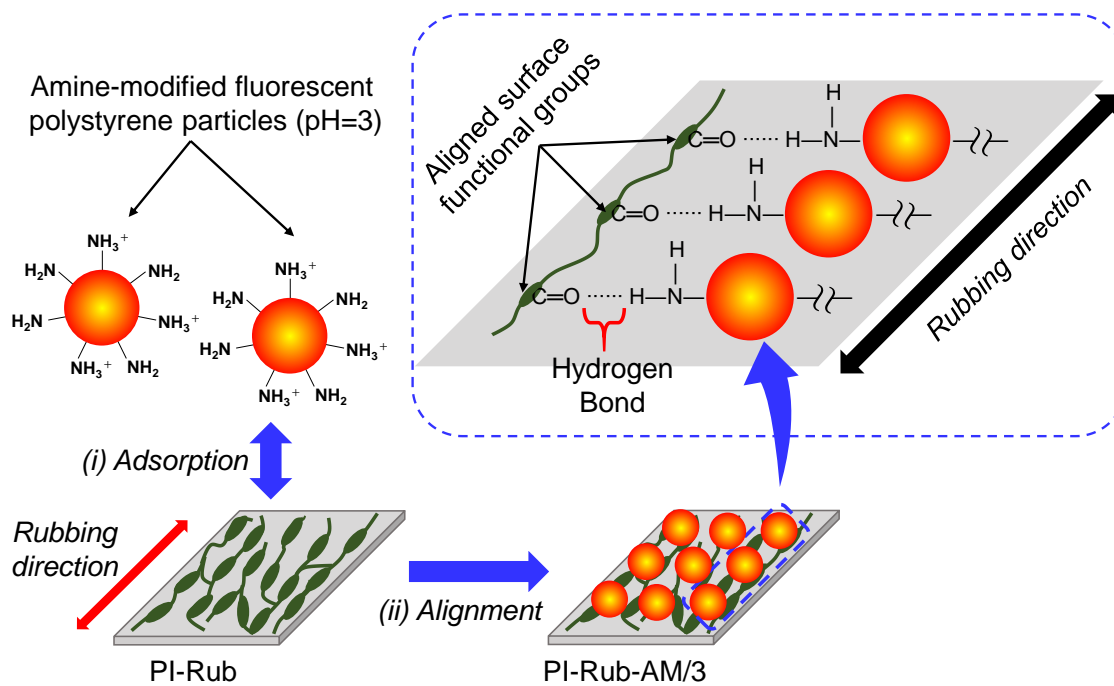

**Figure S7.** Illustration of the interfacial interaction mechanism between amino-modified fluorescent poly(styrene) particles and PI-Rub film.



**Figure S8**

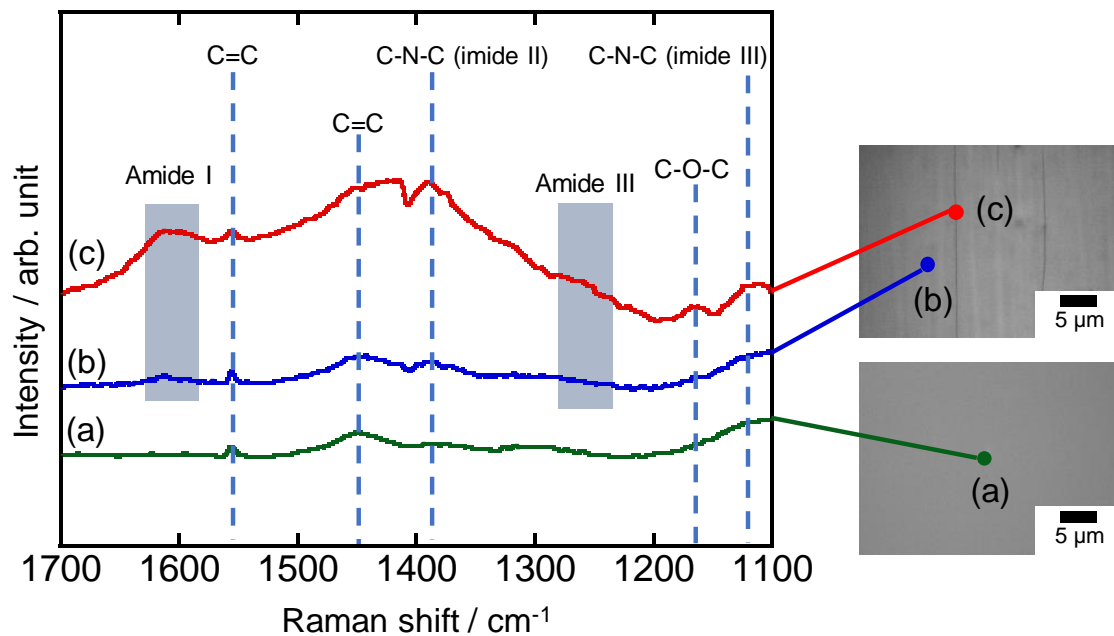

**Figure S8.** Raman spectra of (a) PI-Rub, and (b, c) PI-Rub-Col/3. Here, the Col fibrils that were (b) absence and (c) presence in PI-Rub-Col/3 were measured.

**Table S1**

**Table S1.** Absorption band assignments of the FT-IR spectra of PI-Col/3 and PI-Rub-Col/3 in Figure 4 (a, b).

| Wavenumber / $\text{cm}^{-1}$ | Attribution                   | Bonding state                                   |
|-------------------------------|-------------------------------|-------------------------------------------------|
| 1242                          | C–O–C                         | Stretching                                      |
| 1377                          | C–N in imide                  | Stretching                                      |
| 1500                          | C=C in benzene ring           | Stretching                                      |
| 1555                          | N–H and C–N in amide II       | (N–H) In-plane bending and<br>(C–N ) Stretching |
| 1658                          | C=O in amide I                | Stretching                                      |
| 1723                          | C=O in imide functional group | Asymmetric stretching                           |
| 1778                          | C=O in imide functional group | Symmetric stretching                            |

**Figure S9**

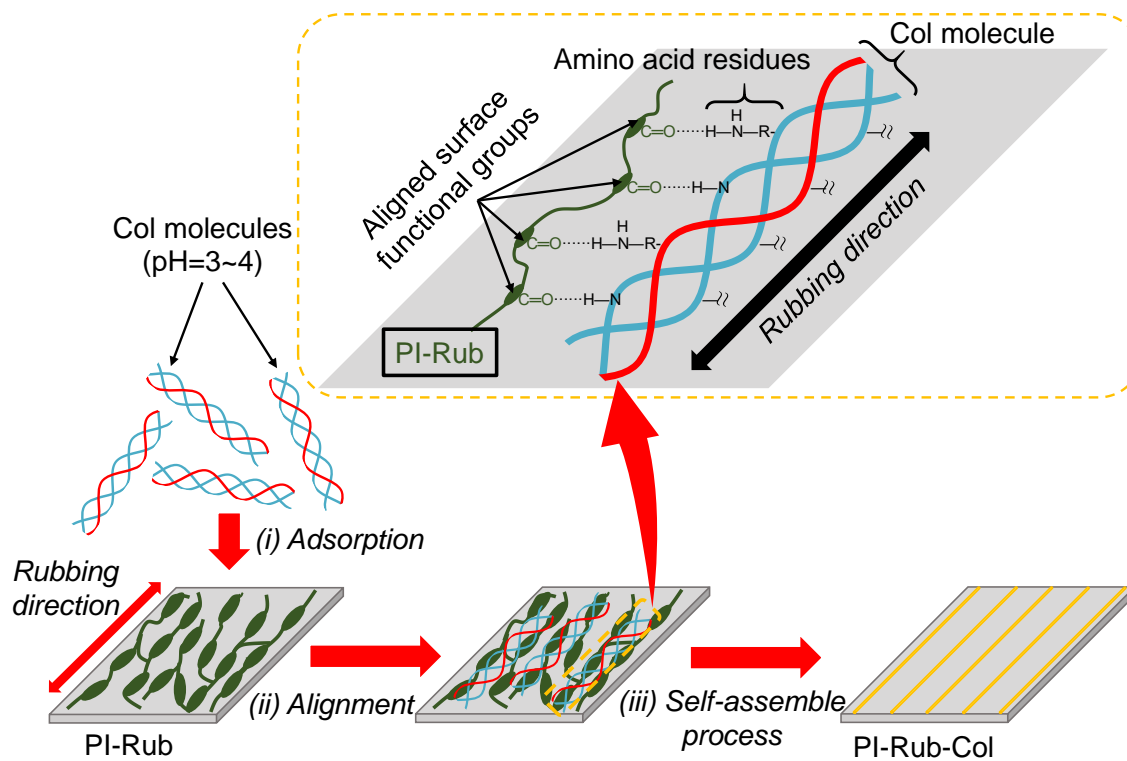

**Figure S9.** Illustration of the highly-oriented processes of the Col fibrils on PI-Rub film.

**Figure S10**

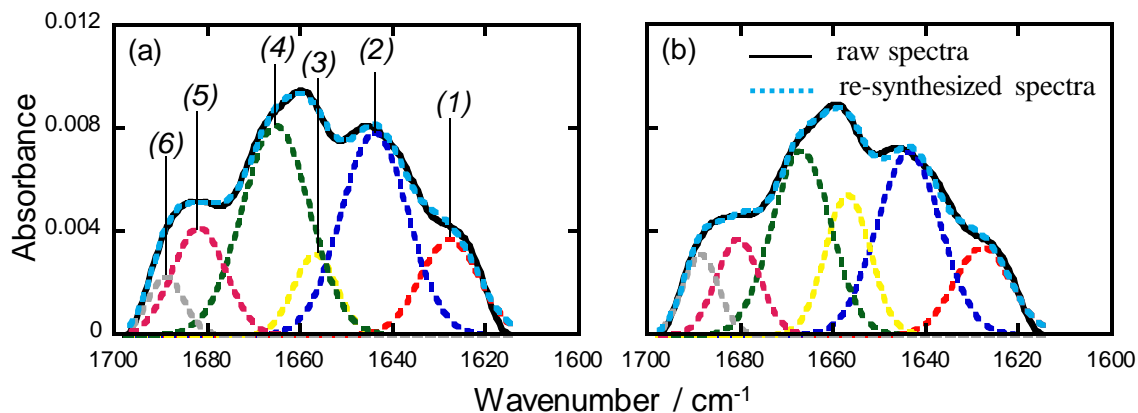

**Figure S10.** FT-IR spectral deconvolution results of the amide I bands of Col fibrils from (a) PI-Col/3 and (b) PI-Rub-Col/3, where the secondary structural components ratios of (1)  $\beta$ -sheet were  $12.5 \pm 0.3\%$  and  $12.2 \pm 0.6\%$ , (2) random coil were  $29.1 \pm 1.0\%$  and  $27.1 \pm 1.6\%$ , (3)  $\alpha$ -helix were  $10.3 \pm 1.8\%$  and  $18.2 \pm 1.9\%$ , (4) turn were  $31.3 \pm 0.9\%$  and  $29.5 \pm 3.8\%$ , (5)  $\beta$ -turn (1) were  $10.5 \pm 1.6\%$  and  $8.6 \pm 2.1\%$  and (6)  $\beta$ -turn (2) were  $6.3 \pm 1.5\%$  and  $4.4 \pm 2.0\%$ , respectively.

**Figure S11**

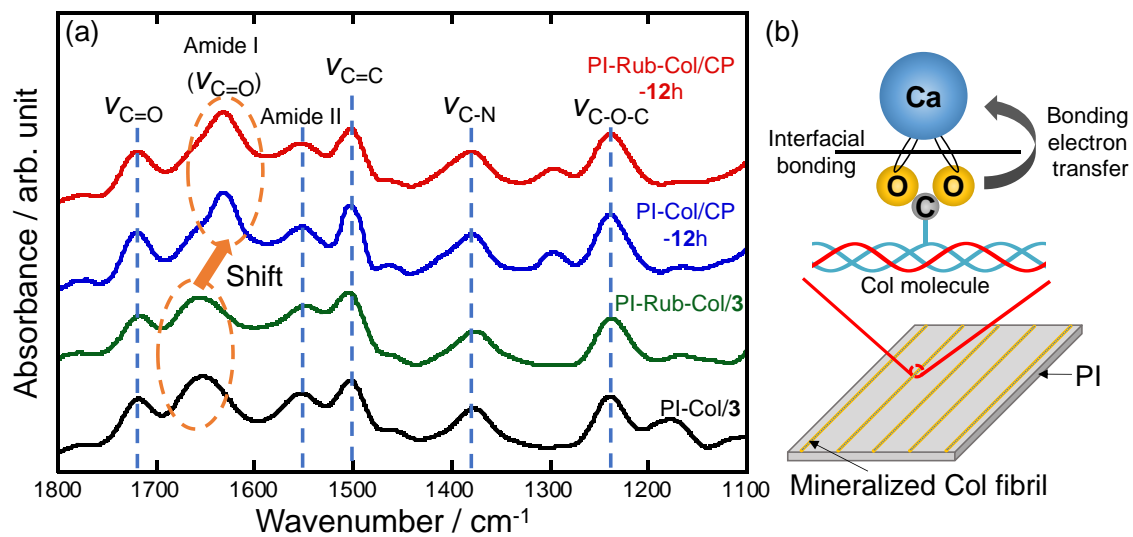

**Figure S11.** (a) FT-IR spectra of PI-Col/3, PI-Rub-Col/3, PI-Col/CP-12h and PI-Rub-Col/CP-12h. (b) Illustration of the possible interfacial structure between  $\text{Ca}^{2+}$  ion and Col fibril.

**Figure S12**

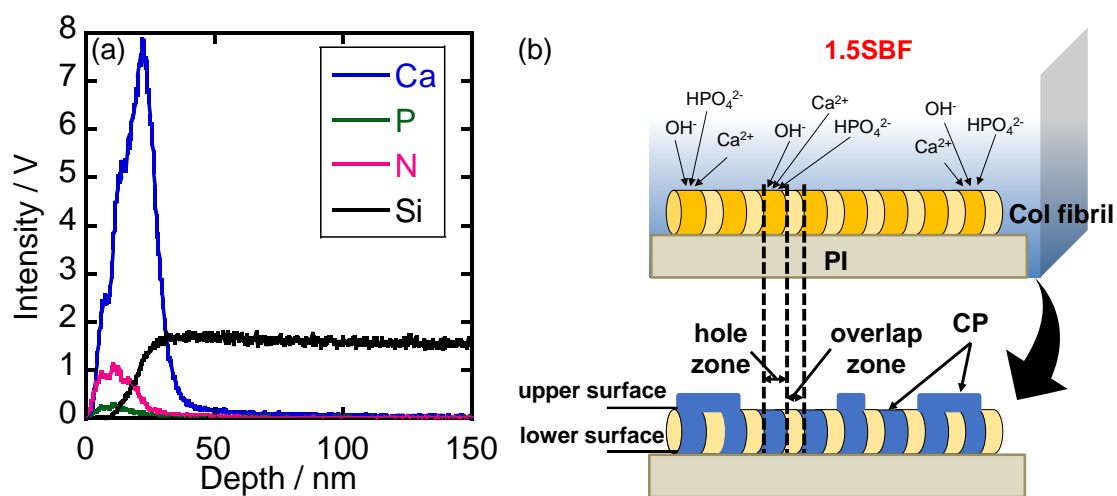

**Figure S12.** (a) GD-OES chemical composition profiles of PI-Rub-Col/CP-12h. (b) Illustration of the precipitation of CP on the hole zone of Col fibril by immersing into 1.5SBF.

**Figure S13**

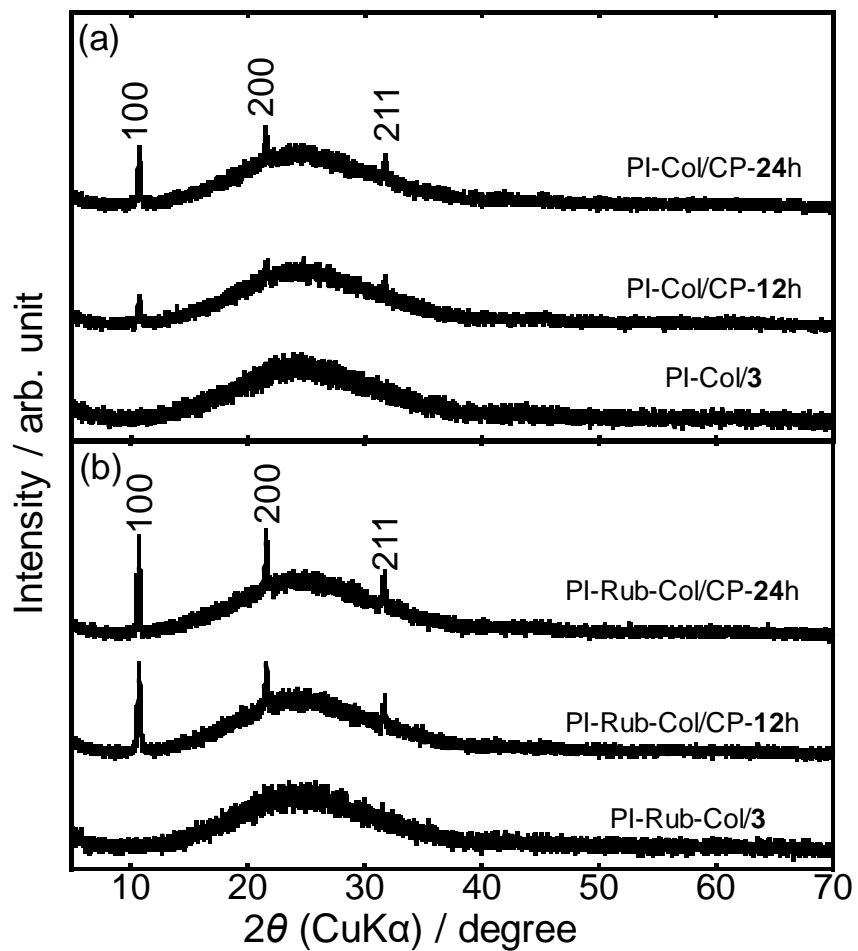

**Figure S13.** XRD patterns of (a) PI-Col/3, PI-Col/CP-12h, PI-Col/CP-24h and (b) PI-Rub-Col/3, PI-Rub-Col/CP-12h, PI-Rub-Col/CP-24h. The patterns of PI-Col/CP-12h, PI-Col/CP-24h, PI-Rub-Col/CP-12h and PI-Rub-Col/CP-24h were possibly attributed to a HAp single phase (JCPDS 00-009-0432,  $\text{Ca}_{10}(\text{PO}_4)_6(\text{OH})_2$ ).

**Figure S14**

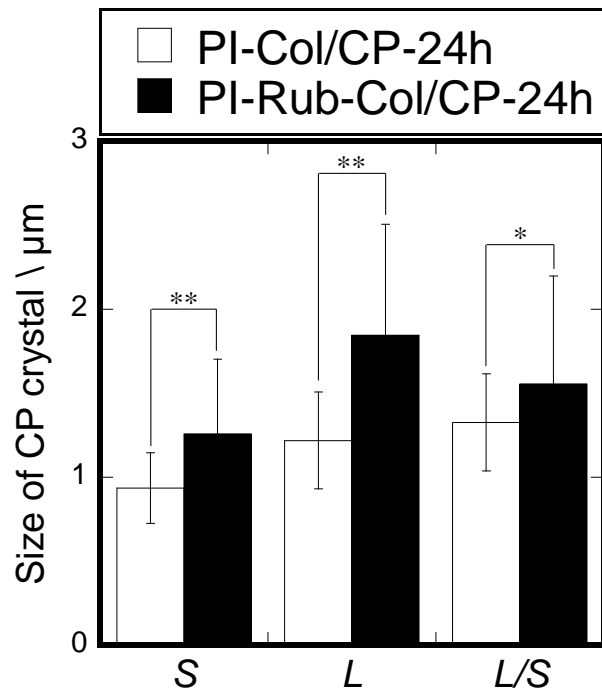

**Figure S14.** The short (*S*) and long (*L*) axis sizes, and the aspect ratio (*L/S*) of the CP crystals precipitated on PI-Co/CP-24h and PI-Rub-Co/CP-24h were calculated from the SEM images. Here, the student's *t*-test results were represented by  $p < 0.05$  (\*) and  $p < 0.01$  (\*\*).
